# Supplementary material for: Interactions between β-cyclodextrin and tea catechins, and potential anti-osteoclastogenesis activity of the (−)-epigallocatechin-3-gallate–β-cyclodextrin complex
Source: Royal Society of Chemistry journal article supplement (doi:10.1039/c9ra05889c), 2019-01-01
Supplement: c9ra05889c1.pdf [file c9ra05889c1.pdf]

## Electronic supplementary information (ESI)

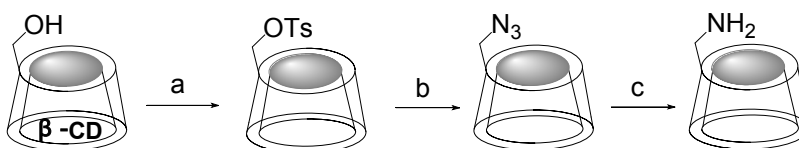

**Supplementary Scheme 1.** Synthesis of  $\beta$ -CD-NH<sub>2</sub>. Reagents and conditions: (a) TsCl, Pyridine, 0 °C, 12 h, 99% yield; (b) NaN<sub>3</sub>, DMF, 50 °C, 80% yield; (c) Pd/C, H<sub>2</sub>, 25 °C, 16 h, 92% yield.

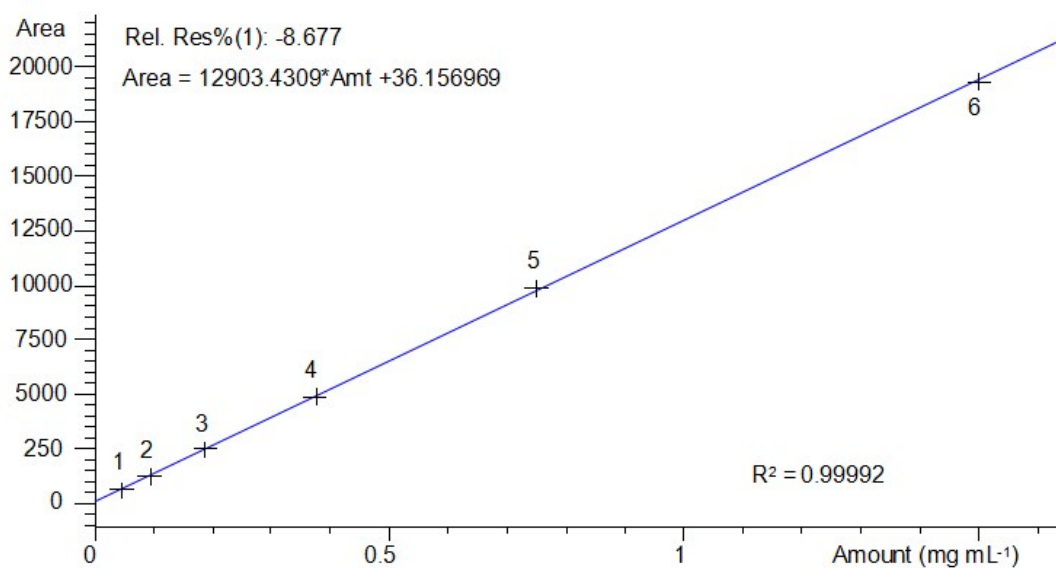

**Supplementary Figure 1.** Calibration curve of EGCG. The EGCG concentrations are: 1.5, 0.75, 0.375, 0.1875, 0.09375, 0.046875 mg mL<sup>-1</sup>. Equation: Area = 12903.4309 \* Amt + 36.156969. R<sup>2</sup> = 0.99992.
